# Supplementary material for: Low-melting molecular complexes of chloroform
Source: Royal Society of Chemistry journal article supplement (doi:10.1039/b914851e), 2009-10-14
Supplement: b914851e.pdf [file b914851e.pdf]

Bond lengths [ $\text{\AA}$ ] and angles [ $^\circ$ ] for co-crystals **I-VI**

**I**

|            |          |            |          |
|------------|----------|------------|----------|
| Cl(1)-C(1) | 1.753(6) | Cl(3)-C(1) | 1.750(5) |
| Cl(2)-C(1) | 1.764(6) | O(1)-C(2)  | 1.420(5) |

|                  |          |                  |          |
|------------------|----------|------------------|----------|
| Cl(3)-C(1)-Cl(1) | 110.5(3) | Cl(1)-C(1)-Cl(2) | 109.6(4) |
| Cl(3)-C(1)-Cl(2) | 111.6(3) |                  |          |

**II**

|         |          |       |          |
|---------|----------|-------|----------|
| Cl1-C1S | 1.745(2) | C1-C2 | 1.507(3) |
| Cl2-C1S | 1.752(2) | C2-C3 | 1.517(4) |
| Cl3-C1S | 1.759(2) | C3-C4 | 1.518(4) |
| O1-C1   | 1.213(2) | C4-C5 | 1.519(3) |
| C1-C5   | 1.494(4) |       |          |

|             |            |          |            |
|-------------|------------|----------|------------|
| Cl1-C1S-Cl2 | 110.09(12) | C5-C1-C2 | 108.34(19) |
| Cl1-C1S-Cl3 | 109.48(10) | C1-C2-C3 | 105.0(2)   |
| Cl2-C1S-Cl3 | 110.98(11) | C2-C3-C4 | 104.3(2)   |
| O1-C1-C5    | 126.1(2)   | C3-C4-C5 | 103.7(2)   |
| O1-C1-C2    | 125.6(2)   | C1-C5-C4 | 105.75(19) |

**III**

|             |            |           |          |
|-------------|------------|-----------|----------|
| Cl(1)-C(1S) | 1.7508(17) | C(1)-C(6) | 1.505(2) |
| Cl(2)-C(1S) | 1.7585(16) | C(2)-C(3) | 1.521(2) |
| Cl(3)-C(1S) | 1.7595(16) | C(3)-C(4) | 1.525(2) |
| O(1)-C(1)   | 1.212(2)   | C(4)-C(5) | 1.512(3) |
| C(1)-C(2)   | 1.499(2)   | C(5)-C(6) | 1.520(3) |

|                   |            |                |            |
|-------------------|------------|----------------|------------|
| Cl(1)-C(1S)-Cl(2) | 110.23(8)  | C(1)-C(2)-C(3) | 112.54(13) |
| Cl(1)-C(1S)-Cl(3) | 110.45(8)  | C(2)-C(3)-C(4) | 110.87(14) |
| Cl(2)-C(1S)-Cl(3) | 110.29(9)  | C(5)-C(4)-C(3) | 110.59(17) |
| O(1)-C(1)-C(2)    | 122.44(14) | C(4)-C(5)-C(6) | 111.47(14) |
| O(1)-C(1)-C(6)    | 122.06(15) | C(1)-C(6)-C(5) | 112.70(13) |
| C(2)-C(1)-C(6)    | 115.48(16) |                |            |

**IV**

|        |          |       |          |
|--------|----------|-------|----------|
| Cl1-C5 | 1.752(3) | N1-C3 | 1.469(3) |
| Cl2-C5 | 1.766(3) | C1-C2 | 1.518(4) |
| Cl3-C5 | 1.757(3) | C3-C4 | 1.518(3) |
| N1-C1  | 1.462(3) |       |          |

|          |            |            |            |
|----------|------------|------------|------------|
| C1-N1-C3 | 112.42(16) | Cl1-C5-Cl3 | 111.05(16) |
| N1-C1-C2 | 110.88(19) | Cl1-C5-Cl2 | 109.20(14) |
| N1-C3-C4 | 110.64(18) | Cl3-C5-Cl2 | 110.10(15) |

**V**

|            |          |           |          |
|------------|----------|-----------|----------|
| Cl(1)-C(1) | 1.762(4) | N(1)-C(3) | 1.443(6) |
|------------|----------|-----------|----------|

|            |          |           |          |
|------------|----------|-----------|----------|
| Cl(2)-C(1) | 1.770(4) | N(1)-C(4) | 1.444(5) |
| Cl(3)-C(1) | 1.753(4) | O(1)-C(2) | 1.220(5) |
| N(1)-C(2)  | 1.332(4) |           |          |

|                  |          |                  |            |
|------------------|----------|------------------|------------|
| C(2)-N(1)-C(3)   | 122.2(3) | Cl(3)-C(1)-Cl(2) | 110.3(2)   |
| C(2)-N(1)-C(4)   | 120.1(3) | Cl(1)-C(1)-Cl(2) | 109.59(19) |
| C(3)-N(1)-C(4)   | 117.7(3) | O(1)-C(2)-N(1)   | 125.9(3)   |
| Cl(3)-C(1)-Cl(1) | 110.9(2) |                  |            |

## VI

|        |            |                     |           |
|--------|------------|---------------------|-----------|
| Cl1-Cl | 1.7613(7)  | C1-Cl1 <sup>1</sup> | 1.7613(7) |
| Cl2-Cl | 1.7587(12) |                     |           |

<sup>1</sup><sub>+X,0.5-Y,+Z</sub>

|                         |           |                          |           |
|-------------------------|-----------|--------------------------|-----------|
| Cl2-C1-Cl1 <sup>1</sup> | 111.16(4) | Cl1 <sup>1</sup> -C1-Cl1 | 109.65(6) |
| Cl2-C1-Cl1              | 111.16(4) |                          |           |

<sup>1</sup><sub>+X,0.5-Y,+Z</sub>
